# Supplementary material for: In vitro nucleus nanoprobe with ultra-small polyethylenimine functionalized graphene quantum dots
Source: Royal Society of Chemistry journal article supplement (doi:10.1039/c5ra13509e), 2015-01-01
Supplement: c5ra13509e1.pdf [file c5ra13509e1.pdf]

## Supporting Information

According to the classical optical reference method, the PL quantum yield (QY) of GQDs-PEI and GQDs were measured and calculated using quinine sulfate as a reference, by the following formula:

$$\varphi_x = \varphi_{st} \left( \frac{A_x / Abs_x}{A_{st} / Abs_{st}} \right) \left( \frac{\eta_x}{\eta_{st}} \right)^2$$

Where  $\varphi$  stands for the quantum yield,  $A$  is the integral area of fluorescence emission peak intensity of PL spectrum,  $Abs$  is the corresponding absorbance of the sample,  $\eta$  is the refractive index of the solvent, subscripts st and x refer to the standard ( which is quinine sulfate in this paper) and the unknown respectively.

As shown in Tab. S1, at 350 nm excitation the PL quantum yield (QY) of GQDs-PEI is *ca.* 53.0%, much higher than GQDs without surface passivation which is 6.5% similar to the reported by Pan et al..

Tab. S1 Quantum yield calculation for GQDs-PEI and GQDs with quinine sulfate as reference

| <i>Samples</i>         |                       | <i>A</i> | <i>η</i> | <i>φ</i> |
|------------------------|-----------------------|----------|----------|----------|
| <b>quinine sulfate</b> | <i>Abs</i>            | 0.0864   | 1.333    | 0.58     |
|                        | <i>A<sub>st</sub></i> | 1.25E+09 |          |          |
| <b>GQDs-PEI</b>        | <i>Abs</i>            | 0.0816   | 1.362    | 0.530    |
|                        | <i>A<sub>x</sub></i>  | 6.24E+08 |          |          |
| <b>GQDs</b>            | <i>Abs</i>            | 0.098    | 1.362    | 0.065    |
|                        | <i>A<sub>x</sub></i>  | 1.52E+08 |          |          |
